# Supplementary material for: Increasing prediction accuracy of pathogenic staging by sample augmentation with a GAN
Source: PLoS One. 2021 Apr 27;16(4):e0250458. doi: 10.1371/journal.pone.0250458 (PMC8078779; doi:10.1371/journal.pone.0250458)
Supplement: S2 Table — (XLSX) [file pone.0250458.s002.xlsx]

## Sheet: Table S2
S2 Table. P-values of t-test between GAN results (GAN1, GAN20 and GAN100) and five comparing results (Ori, FS, MS, SMOTE and DA) in Figure 3
	and P-values of Friedman test between Ori/FS/MS/SMOTE/DA and GAN Series (GAN1/GAN5/GAN20/GAN100)
1) BRCA							5) LUAD							9) ESCA
	GAN1	GAN5	GAN20	GAN100	Friedman test			GAN1	GAN5	GAN20	GAN100	Friedman test			GAN1	GAN5	GAN20	GAN100	Friedman test
Ori	0	0	0	0	0.002		Ori	0	0	0	0	0		Ori	0.344	0	0	0.001	0
Fs	0.107	0.035	0.004	0.027	0.118		Fs	0	0	0.001	0	0		Fs	0.01	0	0	0	0
MS	0.011	0.005	0.002	0.005	0.031		MS	0.003	0	0.01	0	0.002		MS	0.388	0	0	0.001	0
SMOTE	0.002	0.001	0	0	0.004		SMOTE	0	0	0	0	0		SMOTE	0.003	0	0	0	0
DA	0.006	0	0	0.001	0.017		DA	0	0	0	0	0		DA	0.131	0	0	0	0
Friedman test	0.004	0.008	0	0			Friedman test	0	0	0.001	0			Friedman test	0.001	0	0	0
2) HNSC							6) READ							10) KICH
	GAN1	GAN5	GAN20	GAN100	Friedman test			GAN1	GAN5	GAN20	GAN100	Friedman test			GAN1	GAN5	GAN20	GAN100	Friedman test
Ori	0.005	0.006	0.014	0.016	0.039		Ori	0.004	0	0.001	0.008	0		Ori	0.071	0.22	0.198	0.149	0.216
Fs	0.056	0.048	0.123	0.099	0.303		Fs	0.006	0	0.001	0.02	0		Fs	0.087	0.043	0.063	0.103	0.124
MS	0	0	0	0	0.001		MS	0.544	0.022	0.19	0.573	0.067		MS	0.977	0.498	0.6	0.788	0.683
SMOTE	0.008	0.01	0.023	0.025	0.011		SMOTE	0	0	0	0	0		SMOTE	0.023	0.132	0.119	0.083	0.341
DA	0	0	0	0.001	0.005		DA	0.082	0	0.021	0.107	0.033		DA	0.014	0.159	0.142	0.094	0.109
Friedman test	0	0	0	0			Friedman test	0.012	0.001	0.006	0.016			Friedman test	0.002	0.003	0.004	0.005
3) KIRC							7) STAD							11) LIHC
	GAN1	GAN5	GAN20	GAN100	Friedman test			GAN1	GAN5	GAN20	GAN100	Friedman test			GAN1	GAN5	GAN20	GAN100	Friedman test
Ori	0	0	0	0	0		Ori	0.022	0	0.015	0	0		Ori	0.039	0.071	0.07	0.035	0.062
Fs	0	0	0	0	0.001		Fs	0.172	0	0.118	0	0		Fs	0.253	0.395	0.484	0.233	0.512
MS	0.001	0	0	0	0.001		MS	0.512	0	0.381	0	0.008		MS	0.004	0.014	0.003	0.003	0.005
SMOTE	0	0	0	0	0		SMOTE	0.01	0	0.007	0	0		SMOTE	0.03	0.073	0.046	0.025	0.053
DA	0	0	0	0	0		DA	0.016	0	0.011	0	0		DA	0.003	0.008	0.002	0.002	0.011
Friedman test	0	0	0	0			Friedman test	0.053	0	0.021	0			Friedman test	0.015	0.047	0.019	0.005
4) KIRP							8) THCA							12) LUSC
	GAN1	GAN5	GAN20	GAN100	Friedman test			GAN1	GAN5	GAN20	GAN100	Friedman test			GAN1	GAN5	GAN20	GAN100	Friedman test
Ori	0	0	0	0	0.001		Ori	0.098	0.004	0.046	0.012	0.246		Ori	0.002	0.001	0	0.001	0
Fs	0.001	0	0	0	0.002		Fs	0.115	0.005	0.055	0.015	0.544		Fs	0.003	0.002	0	0.001	0.005
MS	0.007	0	0.002	0	0.002		MS	0.137	0.012	0.078	0.025	0.089		MS	0.002	0.001	0	0.001	0
SMOTE	0.275	0	0.184	0.004	0.062		SMOTE	0.052	0.001	0.019	0.004	0.032		SMOTE	0.001	0.001	0	0	0
DA	0.001	0	0	0	0.001		DA	0.011	0	0.002	0	0.001		DA	0.001	0	0	0	0.001
Friedman test	0.001	0	0.001	0			Friedman test	0.018	0.001	0.008	0.001			Friedman test	0.002	0.002	0.001	0.001
