# Supplementary material for: Increasing prediction accuracy of pathogenic staging by sample augmentation with a GAN
Source: PLoS One. 2021 Apr 27;16(4):e0250458. doi: 10.1371/journal.pone.0250458 (PMC8078779; doi:10.1371/journal.pone.0250458)
Supplement: S3 Table — (XLSX) [file pone.0250458.s003.xlsx]

## Sheet: Table S3
S3 Table. The classification results for deterninig optimal n_estimator for Random Forest
THCA (mean±sdv)								BRCA (mean±sdv)
	n_estimator=70		n_estimator=100		n_estimator=130				n_estimator =70		n_estimator =100		n_estimator =130
	Acc	F1	Acc	F1	Acc	F1			Acc	F1	Acc	F1	Acc	F1
G1	0.52±0.13	0.49±0.14	0.54±0.11	0.53±0.13	0.54±0.13	0.51±0.15		G1	0.61±0.11	0.60±0.10	0.64±0.10	0.63±0.09	0.65±0.11	0.65±0.10
G5	0.52±0.11	0.50±0.12	0.53±0.14	0.52±0.15	0.53±0.13	0.51±0.14		G5	0.58±0.13	0.58±0.13	0.62±0.12	0.61±0.11	0.64±0.11	0.63±0.10
G20	0.53±0.13	0.51±0.15	0.55±0.14	0.53±0.14	0.55±0.12	0.52±0.12		G20	0.59±0.11	0.58±0.10	0.61±0.12	0.60±0.10	0.63±0.11	0.62±0.10
G100	0.54±0.13	0.52±0.14	0.56±0.11	0.55±0.11	0.56±0.12	0.54±0.11		G100	0.59±0.13	0.58±0.12	0.60±0.13	0.59±0.11	0.62±0.13	0.60±0.12
STAD (mean±sdv)								READ (mean±sdv)
	n_estimator =70		n_estimator =100		n_estimator =130				n_estimator =70		n_estimator =100		n_estimator =130
	Acc	F1	Acc	F1	Acc	F1			Acc	F1	Acc	F1	Acc	F1
G1	0.44±0.08	0.45±0.10	0.46±0.08	0.45±0.10	0.46±0.09	0.45±0.11		G1	0.43±0.10	0.35±0.12	0.41±0.09	0.32±0.10	0.43±0.11	0.34±0.10
G5	0.41±0.09	0.41±0.09	0.42±0.08	0.41±0.09	0.42±0.07	0.42±0.08		G5	0.42±0.08	0.34±0.09	0.44±0.11	0.36±0.12	0.43±0.10	0.35±0.10
G20	0.41±0.09	0.41±0.10	0.43±0.08	0.42±0.10	0.43±0.08	0.42±0.10		G20	0.44±0.08	0.36±0.07	0.43±0.09	0.35±0.09	0.44±0.09	0.36±0.08
G100	0.43±0.10	0.43±0.11	0.44±0.08	0.43±0.09	0.44±0.09	0.44±0.10		G100	0.42±0.67	0.35±0.08	0.44±0.09	0.35±0.09	0.45±0.09	0.37±0.09
LUAD (mean±sdv)								KIRP (mean±sdv)
	n_estimator =70		n_estimator =100		n_estimator =130				n_estimator =70		n_estimator =100		n_estimator =130
	Acc	F1	Acc	F1	Acc	F1			Acc	F1	Acc	F1	Acc	F1
G1	0.53±0.13	0.52±0.14	0.58±0.10	0.56±0.11	0.59±0.08	0.58±0.08		G1	0.66±0.15	0.64±0.14	0.68±0.12	0.67±0.10	0.67±0.15	0.66±0.13
G5	0.51±0.15	0.49±0.16	0.55±0.13	0.52±0.15	0.56±0.13	0.54±0.15		G5	0.67±0.13	0.66±0.13	0.70±0.10	0.69±0.09	0.69±0.13	0.69±0.11
G20	0.51±0.13	0.46±0.15	0.54±0.14	0.50±0.16	0.54±0.14	0.50±0.16		G20	0.68±0.13	0.67±0.11	0.69±0.11	0.68±0.09	0.7±0.13	0.70±0.11
G100	0.51±0.13	0.47±0.16	0.55±0.14	0.51±0.16	0.53±0.13	0.50±0.16		G100	0.70±0.12	0.69±0.12	0.69±0.10	0.68±0.09	0.70±0.12	0.69±0.11
KIRC (mean±sdv)								HNSC (mean±sdv)
	n_estimator =70		n_estimator =100		N_estimator=130				n_estimator =70		n_estimator =100		n_estimator =130
	Acc	F1	Acc	F1	Acc	F1			Acc	F1	Acc	F1	Acc	F1
G1	0.67±0.09	0.69±0.08	0.70±0.07	0.71±0.07	0.69±0.05	0.71±0.05		G1	0.57±0.10	0.35±0.08	0.60±0.10	0.40±0.10	0.60±0.09	0.4±0.09
G5	0.70±0.09	0.72±0.10	0.72±0.06	0.74±0.07	0.70±0.07	0.71±0.07		G5	0.57±0.13	0.41±0.06	0.60±0.13	0.43±0.08	0.62±0.09	0.43±0.07
G20	0.69±0.11	0.71±0.12	0.71±0.09	0.72±0.09	0.69±0.10	0.70±0.09		G20	0.55±0.12	0.38±0.09	0.57±0.13	0.39±0.10	0.59±0.08	0.42±0.08
G100	0.69±0.12	.0.7±0.13	0.70±0.10	0.71±0.11	0.69±0.10	0.70±0.10		G100	0.52±0.12	0.35±0.05	0.53±0.11	0.35±0.06	0.56±0.09	0.37±0.08
